# Supplementary material for: Theoretical and experimental investigations on mono-substituted and multi-substituted functional polyhedral oligomeric silsesquioxanes
Source: Royal Society of Chemistry journal article supplement (doi:10.1039/c5ra14298a), 2015-01-01
Supplement: c5ra14298a1.pdf [file c5ra14298a1.pdf]

# Theoretical and experimental investigations on mono-substituted and multi-substituted functional polyhedral oligomeric silsesquioxanes

Yong Xia, Hongtao Yao, Meifang Cui, Yun Ma, Zhineng Kong, Baoying Wu, Zhengjian Qi\*, Yueming Sun

College of Chemistry and Chemical engineering, Southeast University, Nanjing, Jiangsu 211189, PR China

Tabel 1S The geometrical parameters  $H_8Si_8O_{12}$  and  $(CH_3)_8Si_8O_{12}$ , the experimental values are shown in brackets

|                      | Bond length (Å) |            |            | Angle (°)           |                     |                 |
|----------------------|-----------------|------------|------------|---------------------|---------------------|-----------------|
|                      | $R_{Si-O}$      | $R_{Si-H}$ | $R_{Si-C}$ | $\angle Si-O-Si$    | $\angle O-Si-O$     | $\angle O-Si-C$ |
| $H_8Si_8O_{12}$      | 1.643 (1.620)   | (1.450)    | /          | 147.5-148.9 (147.5) | 109.5-109.7 (109.6) | /               |
| $(CH_3)_8Si_8O_{12}$ | 1.647           | /          | 1.856      | 148.2               | 109.3               | 109.6           |

Table 2S The related vibration frequencies of  $\text{H}_8\text{Si}_8\text{O}_{12}$  and  $(\text{CH}_3)_8\text{Si}_8\text{O}_{12}$  calculated (DFT), experimentally measured (Expt), and reference data (RD) in  $\text{cm}^{-1}$

|                                           | DFT <sup>a</sup> | Expt <sup>b</sup> | RD <sup>c</sup> |
|-------------------------------------------|------------------|-------------------|-----------------|
| $\text{H}_8\text{Si}_8\text{O}_{12}$      |                  |                   |                 |
| Si-O-Si (ring-asym)                       | 1139             | 1140              | 1155            |
| Si-H (stretch)                            | 2274             | 2277              | 2375            |
| Si-H (wag)                                | 883              | 881               | 898             |
| O-Si-O (bend)                             | 543              | 531               | 559             |
| Si-O-Si (bend)                            | 451              | 465               | 451-453         |
| $(\text{CH}_3)_8\text{Si}_8\text{O}_{12}$ |                  |                   |                 |
| Si-O-Si (ring-asym)                       | 1120             | 1117              | 1138            |
| Si-C (stretch)                            | 1314             | 1270              | 1345-1347       |
| Si-C (wag)                                | 843              | 824               | 856             |
| Si-C (wag)                                | 770              | 773               | 781             |
| O-Si-O (bend)                             | 503              | 518               | 510-512         |
| Si-O-Si (bend)                            | 451              | 464               | 450             |

<sup>a</sup> our work; <sup>b</sup> data are from reference 49; <sup>c</sup> data are from reference 50.

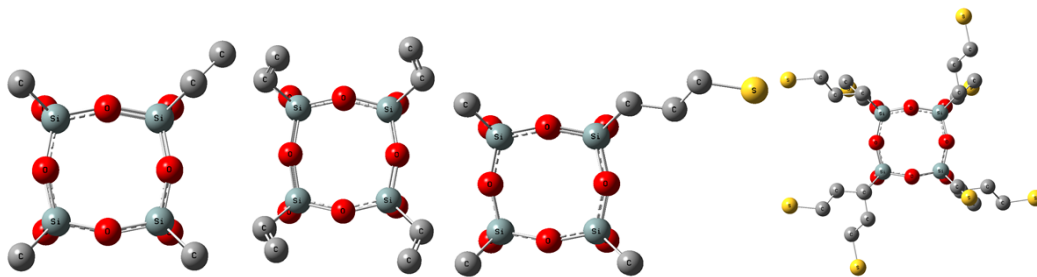

Fig. 1S The obtained optimized geometry of  $(C_2H_5)(CH_3)_7Si_8O_{12}$ ,  $(C_2H_5)_8Si_8O_{12}$ ,  $(C_3H_6SH)(CH_3)_7Si_8O_{12}$ , and  $(C_3H_6SH)_8Si_8O_{12}$  (from left to right).
